# Supplementary material for: DNA Damage Response Genes in Osteosarcoma
Source: Hindawi journal article supplement (doi:10.1155/2021/9365953), 2021-11-02
Supplement: f1 [file 9365953.f1.zip]

Archive with 2 entries (2 files):
- 9365953.f1/Table S1.pdf
- 9365953.f1/Table S2.pdf
