# Supplementary material for: DNA Damage Response Genes in Osteosarcoma
Source: Hindawi journal article supplement (doi:10.1155/2021/9365953), 2021-11-02
Supplement: f1 [file 9365953.f1.zip]

**Table S1 DDR genes of univariate Cox regression analysis in the TARGET group**

| id      | HR       | HR. 95L  | HR. 95H  | pvalue   |
|---------|----------|----------|----------|----------|
| APLF    | 0.808887 | 0.414935 | 1.576869 | 0.533457 |
| APTX    | 1.414176 | 0.82513  | 2.423731 | 0.207415 |
| ASCC3   | 0.970074 | 0.607645 | 1.548674 | 0.898703 |
| DNTT    | 4.886295 | 0.054842 | 435.3582 | 0.488594 |
| LIG1    | 0.898845 | 0.572458 | 1.411321 | 0.643161 |
| LIG3    | 0.876623 | 0.570566 | 1.346853 | 0.547863 |
| LIG4    | 1.308924 | 0.816484 | 2.098364 | 0.263577 |
| MRE11A  | 1.318522 | 0.862605 | 2.015407 | 0.201512 |
| NBN     | 0.98776  | 0.674114 | 1.447338 | 0.949623 |
| NHEJ1   | 1.697009 | 1.153403 | 2.496821 | 0.007267 |
| PARG    | 1.080911 | 0.634419 | 1.841637 | 0.774736 |
| PARP1   | 0.624183 | 0.42429  | 0.91825  | 0.016712 |
| PARP3   | 0.841355 | 0.546719 | 1.294776 | 0.432222 |
| PARPBP  | 0.884098 | 0.547    | 1.428938 | 0.615047 |
| PNKP    | 1.136077 | 0.735297 | 1.755304 | 0.565457 |
| POLB    | 0.847515 | 0.562018 | 1.278042 | 0.429875 |
| POLL    | 1.457032 | 0.839823 | 2.527846 | 0.180577 |
| POLM    | 0.894799 | 0.559078 | 1.432117 | 0.643198 |
| PRKDC   | 0.906889 | 0.645218 | 1.274682 | 0.573648 |
| RAD50   | 0.812622 | 0.484122 | 1.364025 | 0.432344 |
| RNF168  | 0.708948 | 0.445497 | 1.128194 | 0.146748 |
| RNF8    | 0.760106 | 0.496565 | 1.163516 | 0.206675 |
| TP53BP1 | 0.819112 | 0.494744 | 1.356145 | 0.43794  |
| XRCC1   | 0.962806 | 0.542979 | 1.707238 | 0.896804 |
| XRCC2   | 0.987247 | 0.662637 | 1.470875 | 0.949688 |
| XRCC3   | 1.28044  | 0.844518 | 1.941374 | 0.244364 |
| XRCC4   | 0.784321 | 0.423557 | 1.452363 | 0.439637 |
| XRCC5   | 0.878507 | 0.53706  | 1.437036 | 0.60593  |
| XRCC6   | 0.709833 | 0.429361 | 1.173519 | 0.181498 |
| UBE2A   | 0.832249 | 0.496982 | 1.393689 | 0.485149 |
| EXO1    | 1.011269 | 0.620126 | 1.649124 | 0.964178 |
| HMGB1   | 1.016339 | 0.701814 | 1.471822 | 0.931639 |
| MLH1    | 0.569035 | 0.333616 | 0.970582 | 0.038493 |
| MLH3    | 0.64123  | 0.407082 | 1.010056 | 0.055263 |
| MSH2    | 0.87985  | 0.589141 | 1.314007 | 0.531635 |
| MSH3    | 0.783978 | 0.435723 | 1.41058  | 0.416737 |
| MSH6    | 0.821877 | 0.533929 | 1.265113 | 0.372725 |
| PCNA    | 0.880313 | 0.61717  | 1.255652 | 0.481716 |
| PMS1    | 1.447365 | 0.924122 | 2.266873 | 0.106259 |
| PMS2    | 0.7496   | 0.432031 | 1.300602 | 0.305301 |
| POLD1   | 0.870687 | 0.559099 | 1.355925 | 0.540072 |
| POLD2   | 0.705431 | 0.427817 | 1.163192 | 0.171459 |
| POLD3   | 1.151998 | 0.744644 | 1.782192 | 0.525055 |
| POLD4   | 0.901076 | 0.579635 | 1.400774 | 0.643543 |
| RFC1    | 0.703943 | 0.447284 | 1.107876 | 0.129213 |
| RFC2    | 0.589791 | 0.34724  | 1.001768 | 0.050769 |
| RFC3    | 0.911727 | 0.621822 | 1.336791 | 0.635993 |
| RFC4    | 1.101447 | 0.734671 | 1.65133  | 0.640031 |
| RFC5    | 0.811427 | 0.490339 | 1.342774 | 0.416163 |
| RPA1    | 0.785073 | 0.48443  | 1.2723   | 0.325942 |
| RPA2    | 0.821313 | 0.506886 | 1.330783 | 0.42404  |

|         |          |          |          |          |
|---------|----------|----------|----------|----------|
| RPA3    | 0.693288 | 0.438699 | 1.095624 | 0.116685 |
| RPA4    | 0.694626 | 0.202199 | 2.386296 | 0.562799 |
| ALKBH1  | 0.631431 | 0.380298 | 1.048403 | 0.075528 |
| ALKBH2  | 1.511692 | 0.837848 | 2.72748  | 0.169941 |
| ALKBH3  | 0.810408 | 0.470939 | 1.394577 | 0.447823 |
| APEX1   | 0.748435 | 0.487327 | 1.149444 | 0.185596 |
| APEX2   | 0.613833 | 0.402856 | 0.935301 | 0.023132 |
| APITD1  | 0.887974 | 0.524183 | 1.504244 | 0.658642 |
| ATM     | 1.25615  | 0.852339 | 1.851275 | 0.249109 |
| ATR     | 0.972144 | 0.573892 | 1.646762 | 0.916331 |
| ATRIP   | 0.830125 | 0.456509 | 1.509514 | 0.541701 |
| ATRX    | 0.994794 | 0.686721 | 1.441072 | 0.977977 |
| BARD1   | 0.932814 | 0.609325 | 1.428042 | 0.748894 |
| BLM     | 1.094866 | 0.728597 | 1.645259 | 0.662717 |
| BRCA1   | 0.837367 | 0.544609 | 1.287499 | 0.418713 |
| BRCA2   | 0.965076 | 0.559592 | 1.664376 | 0.898274 |
| BRE     | 0.669007 | 0.432193 | 1.03558  | 0.071368 |
| BRIP1   | 0.800321 | 0.542846 | 1.179918 | 0.260746 |
| CCNH    | 0.748567 | 0.445903 | 1.256669 | 0.273246 |
| CDK7    | 1.119139 | 0.624922 | 2.004206 | 0.704977 |
| CETN2   | 0.601671 | 0.370676 | 0.976616 | 0.039811 |
| CHAF1A  | 0.747961 | 0.492929 | 1.134941 | 0.172255 |
| CHEK1   | 1.222345 | 0.821737 | 1.818255 | 0.321719 |
| CHEK2   | 0.996224 | 0.632227 | 1.569788 | 0.98699  |
| CLK2    | 1.659449 | 1.071279 | 2.570546 | 0.023309 |
| CUL3    | 0.868697 | 0.533118 | 1.415509 | 0.572038 |
| CUL4A   | 1.024869 | 0.707304 | 1.485014 | 0.896706 |
| CUL5    | 1.040383 | 0.701075 | 1.543909 | 0.844163 |
| DCLRE1A | 1.489653 | 0.921163 | 2.408982 | 0.104138 |
| DCLRE1B | 0.643577 | 0.406128 | 1.019853 | 0.060618 |
| DCLRE1C | 1.017091 | 0.67555  | 1.531307 | 0.935304 |
| DDB1    | 0.847213 | 0.455995 | 1.574074 | 0.599869 |
| DDB2    | 0.699963 | 0.438899 | 1.116312 | 0.13415  |
| DMC1    | 1.214073 | 0.937127 | 1.572864 | 0.141994 |
| DNA2    | 1.154346 | 0.770164 | 1.73017  | 0.486956 |
| DUT     | 0.843558 | 0.527367 | 1.349328 | 0.477795 |
| EID3    | 1.125385 | 0.76272  | 1.660491 | 0.551719 |
| EME1    | 0.891797 | 0.568539 | 1.398851 | 0.618069 |
| EME2    | 1.485856 | 0.938125 | 2.353385 | 0.091462 |
| ERCC1   | 0.774742 | 0.457875 | 1.310895 | 0.34154  |
| ERCC2   | 0.584954 | 0.369163 | 0.926883 | 0.022415 |
| ERCC3   | 1.148637 | 0.662079 | 1.992762 | 0.622029 |
| ERCC4   | 1.032941 | 0.773586 | 1.379248 | 0.826103 |
| ERCC5   | 1.019183 | 0.658181 | 1.578189 | 0.932127 |
| ERCC6   | 1.096799 | 0.6178   | 1.947178 | 0.752383 |
| ERCC8   | 0.753975 | 0.452434 | 1.256488 | 0.278478 |
| FAAP100 | 0.94019  | 0.573398 | 1.541612 | 0.806888 |
| FAAP24  | 0.655802 | 0.408952 | 1.051655 | 0.079956 |
| FAAP20  | 0.824482 | 0.541574 | 1.255177 | 0.36809  |
| FAM175A | 1.163697 | 0.778185 | 1.740191 | 0.460259 |
| FAN1    | 1.305438 | 0.835024 | 2.040862 | 0.242351 |
| FANCA   | 0.914545 | 0.647739 | 1.291248 | 0.611752 |
| FANCB   | 1.000885 | 0.609333 | 1.644043 | 0.997214 |
| FANCC   | 1.678589 | 1.059093 | 2.66045  | 0.027503 |

|          |          |          |          |          |
|----------|----------|----------|----------|----------|
| FANCD2   | 1.034103 | 0.778524 | 1.373585 | 0.81691  |
| FANCE    | 1.188508 | 0.813348 | 1.73671  | 0.372178 |
| FANCF    | 0.571782 | 0.298617 | 1.094828 | 0.091678 |
| FANCG    | 1.124767 | 0.67121  | 1.884807 | 0.65532  |
| FANCI    | 0.983425 | 0.69088  | 1.399844 | 0.926078 |
| FANCL    | 0.924321 | 0.622137 | 1.373282 | 0.696835 |
| FANCM    | 1.210289 | 0.697974 | 2.098644 | 0.496754 |
| FEN1     | 0.923239 | 0.637879 | 1.336256 | 0.672024 |
| GADD45A  | 0.774704 | 0.575717 | 1.042468 | 0.091917 |
| GADD45G  | 1.325795 | 0.991587 | 1.772645 | 0.057047 |
| GEN1     | 1.032434 | 0.638135 | 1.67037  | 0.896543 |
| GTF2H1   | 0.917753 | 0.563958 | 1.493497 | 0.729753 |
| GTF2H2   | 0.817    | 0.566094 | 1.179113 | 0.280249 |
| GTF2H3   | 0.838985 | 0.541992 | 1.29872  | 0.430983 |
| GTF2H4   | 1.063457 | 0.641265 | 1.763606 | 0.811579 |
| GTF2H5   | 0.498597 | 0.275966 | 0.900834 | 0.021111 |
| H2AFX    | 0.899085 | 0.631767 | 1.279514 | 0.554603 |
| HELQ     | 0.991467 | 0.57284  | 1.716024 | 0.975575 |
| HES1     | 0.75713  | 0.561014 | 1.021802 | 0.068918 |
| HFM1     | 0.699031 | 0.340584 | 1.434727 | 0.32906  |
| HLTF     | 1.113455 | 0.780606 | 1.588232 | 0.553129 |
| HMGB2    | 1.113372 | 0.813012 | 1.524697 | 0.50319  |
| HUS1     | 0.865501 | 0.540323 | 1.386378 | 0.547903 |
| INO80    | 0.97426  | 0.58868  | 1.612393 | 0.919195 |
| KAT5     | 0.982572 | 0.569068 | 1.696542 | 0.949694 |
| MAD2L2   | 0.66964  | 0.425822 | 1.053065 | 0.082543 |
| MBD4     | 0.711069 | 0.399685 | 1.265043 | 0.246011 |
| MDC1     | 1.000331 | 0.661507 | 1.512699 | 0.99875  |
| MGMT     | 1.049813 | 0.745711 | 1.477927 | 0.780578 |
| MMS19    | 1.489764 | 0.853045 | 2.601738 | 0.161143 |
| MNAT1    | 1.100808 | 0.689696 | 1.756974 | 0.68723  |
| MPG      | 0.792457 | 0.486348 | 1.291232 | 0.350379 |
| MPLKIP   | 0.867889 | 0.469456 | 1.604475 | 0.651313 |
| MRPL40   | 0.622639 | 0.385513 | 1.005617 | 0.052738 |
| MUS81    | 1.250514 | 0.781416 | 2.001222 | 0.351413 |
| MUTYH    | 1.046606 | 0.636862 | 1.719969 | 0.857366 |
| NABP2    | 0.865944 | 0.514668 | 1.456979 | 0.587681 |
| NEIL1    | 1.238523 | 0.87803  | 1.747024 | 0.222903 |
| NEIL2    | 1.24117  | 0.749502 | 2.055368 | 0.401173 |
| NEIL3    | 0.992423 | 0.636757 | 1.546749 | 0.973203 |
| NFATC2IP | 1.109362 | 0.68236  | 1.803572 | 0.675534 |
| NSMCE1   | 0.662844 | 0.36418  | 1.206443 | 0.178379 |
| NSMCE2   | 1.207988 | 0.77439  | 1.884368 | 0.404888 |
| NSMCE3   | 1.020055 | 0.624205 | 1.66694  | 0.93684  |
| NSMCE4A  | 1.155658 | 0.72645  | 1.838454 | 0.54136  |
| NTHL1    | 1.004717 | 0.67803  | 1.488807 | 0.98129  |
| NUDT1    | 1.304026 | 0.888573 | 1.913726 | 0.174991 |
| NUDT15   | 0.994263 | 0.587651 | 1.68222  | 0.982891 |
| NUDT18   | 0.991485 | 0.649721 | 1.513023 | 0.968368 |
| RRM1     | 0.81549  | 0.564819 | 1.177411 | 0.276401 |
| RRM2     | 0.873559 | 0.631541 | 1.208322 | 0.414101 |
| OGG1     | 0.812133 | 0.489965 | 1.34614  | 0.419612 |
| PALB2    | 0.712251 | 0.41614  | 1.219065 | 0.215887 |
| PARP2    | 0.786015 | 0.496341 | 1.244749 | 0.304633 |

|          |          |          |          |          |
|----------|----------|----------|----------|----------|
| PARP4    | 0.793188 | 0.507383 | 1.239984 | 0.309447 |
| PAXIP1   | 1.163894 | 0.724623 | 1.869455 | 0.53018  |
| PER1     | 0.978394 | 0.772517 | 1.239136 | 0.856205 |
| POLA1    | 0.821976 | 0.520444 | 1.298209 | 0.400498 |
| POLE     | 1.173784 | 0.805041 | 1.711428 | 0.404948 |
| POLE2    | 1.061295 | 0.718705 | 1.567192 | 0.764842 |
| POLE3    | 0.832203 | 0.508779 | 1.361223 | 0.464399 |
| POLE4    | 0.697379 | 0.439593 | 1.106334 | 0.125823 |
| POLG     | 1.715017 | 1.070807 | 2.746791 | 0.024791 |
| POLH     | 1.154725 | 0.805124 | 1.656129 | 0.434281 |
| POLI     | 1.385245 | 0.85347  | 2.248353 | 0.187247 |
| POLK     | 1.083821 | 0.666719 | 1.761863 | 0.745413 |
| POLN     | 0.959683 | 0.635603 | 1.449004 | 0.844801 |
| POLQ     | 1.221516 | 0.761114 | 1.960417 | 0.4071   |
| PPP4C    | 0.565691 | 0.340488 | 0.939847 | 0.027844 |
| PPP4R1   | 0.713677 | 0.456513 | 1.115709 | 0.138958 |
| PPP4R2   | 1.034481 | 0.689115 | 1.552934 | 0.870085 |
| PPP4R4   | 1.053339 | 0.616483 | 1.799761 | 0.849209 |
| PRPF19   | 0.749748 | 0.453811 | 1.23867  | 0.26085  |
| RAD1     | 0.701622 | 0.441834 | 1.114158 | 0.133142 |
| RAD17    | 0.770466 | 0.465529 | 1.275147 | 0.310389 |
| RAD18    | 0.874923 | 0.557606 | 1.372816 | 0.561004 |
| RAD23A   | 1.511288 | 0.978162 | 2.334983 | 0.062816 |
| RAD23B   | 0.879396 | 0.557689 | 1.386682 | 0.580204 |
| RAD51    | 0.585109 | 0.36043  | 0.949846 | 0.03015  |
| RAD51B   | 0.892457 | 0.601405 | 1.324366 | 0.572096 |
| RAD51C   | 0.680641 | 0.449561 | 1.0305   | 0.069066 |
| RAD51D   | 0.879967 | 0.505679 | 1.531291 | 0.65098  |
| RAD52    | 1.159745 | 0.863452 | 1.55771  | 0.324833 |
| RAD54B   | 0.941711 | 0.633114 | 1.400726 | 0.766876 |
| RAD54L   | 0.755208 | 0.490387 | 1.163037 | 0.20252  |
| RAD9A    | 1.375459 | 0.893056 | 2.118442 | 0.147987 |
| RBBP8    | 1.117558 | 0.743803 | 1.67912  | 0.592599 |
| RBX1     | 0.780273 | 0.470538 | 1.293891 | 0.336305 |
| RDM1     | 1.227653 | 0.746913 | 2.017814 | 0.41852  |
| RECQL    | 0.807957 | 0.579617 | 1.126253 | 0.208262 |
| RECQL4   | 0.946098 | 0.687526 | 1.301916 | 0.733723 |
| RECQL5   | 1.166815 | 0.723593 | 1.881524 | 0.526831 |
| REV1     | 1.26242  | 0.794833 | 2.005081 | 0.323546 |
| REV3L    | 1.136179 | 0.764888 | 1.687703 | 0.527138 |
| RIF1     | 1.1589   | 0.784578 | 1.711812 | 0.45871  |
| RMI1     | 0.930924 | 0.612283 | 1.415391 | 0.737751 |
| RMI2     | 0.572041 | 0.378099 | 0.865464 | 0.008195 |
| RNMT     | 1.051126 | 0.629966 | 1.753851 | 0.84861  |
| RRM2B    | 1.18617  | 0.776138 | 1.812823 | 0.430158 |
| RTEL1    | 1.054704 | 0.670799 | 1.658321 | 0.817573 |
| SETMAR   | 0.582035 | 0.35103  | 0.965061 | 0.035922 |
| SHFM1    | 0.909202 | 0.671035 | 1.231901 | 0.539076 |
| SHPRH    | 1.366778 | 0.889438 | 2.100295 | 0.154029 |
| SLX1A    | 0.821851 | 0.554131 | 1.218916 | 0.329267 |
| SLX1B    | 1.047855 | 0.83529  | 1.314513 | 0.686136 |
| SLX4     | 0.540325 | 0.274129 | 1.065015 | 0.075399 |
| SMARCAD1 | 1.035586 | 0.676413 | 1.585481 | 0.872163 |
| SMC5     | 1.402822 | 0.926417 | 2.124215 | 0.109837 |

|         |          |          |          |          |
|---------|----------|----------|----------|----------|
| SMC6    | 0.911404 | 0.613655 | 1.353622 | 0.645752 |
| SMUG1   | 0.781909 | 0.472828 | 1.293034 | 0.33776  |
| SPO11   | 2.77572  | 0.229019 | 33.64178 | 0.422537 |
| STRA13  | 0.908538 | 0.58953  | 1.400168 | 0.663806 |
| SWSAP1  | 0.905029 | 0.502626 | 1.629594 | 0.73947  |
| TCEA1   | 1.029328 | 0.711837 | 1.488427 | 0.877912 |
| TCEB1   | 0.768196 | 0.441716 | 1.335984 | 0.350297 |
| TCEB2   | 0.651619 | 0.409842 | 1.036027 | 0.07024  |
| TCEB3   | 0.755683 | 0.458166 | 1.246397 | 0.272534 |
| TDG     | 1.366534 | 0.852737 | 2.189905 | 0.194331 |
| TDP1    | 0.819026 | 0.512679 | 1.308427 | 0.403575 |
| TELO2   | 0.842054 | 0.510205 | 1.389746 | 0.501271 |
| TOP3A   | 0.908485 | 0.666346 | 1.238613 | 0.543937 |
| TOP3B   | 0.961589 | 0.610535 | 1.514499 | 0.865799 |
| TOPBP1  | 1.250819 | 0.814785 | 1.920197 | 0.306144 |
| TP53    | 1.08858  | 0.948453 | 1.24941  | 0.227352 |
| TREX1   | 0.681682 | 0.469897 | 0.98892  | 0.043523 |
| TREX2   | 0.886532 | 0.438953 | 1.790486 | 0.737008 |
| TYMS    | 0.922079 | 0.660188 | 1.28786  | 0.634148 |
| UBE2B   | 1.080752 | 0.615151 | 1.898759 | 0.787095 |
| UBE2N   | 0.916536 | 0.602402 | 1.39448  | 0.683989 |
| UBE2T   | 0.881121 | 0.631135 | 1.230124 | 0.457241 |
| UBE2V2  | 0.993013 | 0.682027 | 1.445801 | 0.97082  |
| UIMC1   | 1.1406   | 0.659311 | 1.973224 | 0.638057 |
| UNG     | 0.9619   | 0.607591 | 1.52282  | 0.868376 |
| USP1    | 0.929065 | 0.675182 | 1.278414 | 0.651428 |
| UVSSA   | 0.912645 | 0.570913 | 1.458927 | 0.702529 |
| WDR48   | 1.07382  | 0.653281 | 1.765075 | 0.778795 |
| WRN     | 1.194592 | 0.742624 | 1.921633 | 0.463502 |
| XAB2    | 0.71987  | 0.47256  | 1.096606 | 0.125883 |
| XPA     | 1.434467 | 0.822658 | 2.501277 | 0.203437 |
| XPC     | 0.735537 | 0.441321 | 1.225899 | 0.238598 |
| ZSWIM7  | 0.809457 | 0.620795 | 1.055455 | 0.118446 |
| PTEN    | 1.196826 | 0.821066 | 1.744551 | 0.350033 |
| TDP2    | 0.666789 | 0.420739 | 1.056733 | 0.084513 |
| ENDOV   | 0.6086   | 0.368718 | 1.004546 | 0.05211  |
| SPRTN   | 1.294189 | 0.734654 | 2.279884 | 0.372054 |
| RNF4    | 0.771341 | 0.485243 | 1.226123 | 0.27225  |
| SMARCA4 | 1.249236 | 0.806366 | 1.935336 | 0.319077 |
| IDH1    | 0.904888 | 0.604043 | 1.355569 | 0.62791  |
| SOX4    | 0.66345  | 0.486231 | 0.905261 | 0.009662 |
| WEE1    | 0.969049 | 0.677579 | 1.3859   | 0.863258 |
| RAD9B   | 1.221762 | 0.781817 | 1.909273 | 0.379209 |
| AEN     | 0.852329 | 0.524285 | 1.38563  | 0.519276 |
| PLK3    | 0.753321 | 0.484309 | 1.171758 | 0.208849 |
| EXO5    | 0.672165 | 0.402381 | 1.12283  | 0.129158 |
| CDC5L   | 0.883734 | 0.618651 | 1.262401 | 0.496945 |
| BCAS2   | 0.82862  | 0.559664 | 1.226827 | 0.347764 |
| PLRG1   | 0.871781 | 0.568089 | 1.337823 | 0.530015 |
| YWHAB   | 0.575434 | 0.354831 | 0.933188 | 0.025073 |
| YWHAG   | 0.803733 | 0.520916 | 1.240096 | 0.323428 |
| YWHAE   | 0.880025 | 0.557529 | 1.389067 | 0.583143 |
| CDC25A  | 0.841005 | 0.548698 | 1.289032 | 0.426778 |
| CDC25B  | 0.700558 | 0.466618 | 1.051784 | 0.086079 |

|         |          |          |          |          |
|---------|----------|----------|----------|----------|
| CDC25C  | 0.866783 | 0.540978 | 1.388805 | 0.55224  |
| BABAM1  | 0.625773 | 0.362781 | 1.079417 | 0.091945 |
| BRCC3   | 0.764666 | 0.460965 | 1.268457 | 0.298773 |
| TTK     | 1.036503 | 0.725118 | 1.481607 | 0.844074 |
| SMARCC1 | 1.001214 | 0.646007 | 1.551734 | 0.995669 |
| SWI5    | 0.56547  | 0.35985  | 0.888583 | 0.013428 |
| MORF4L1 | 0.950763 | 0.608734 | 1.484969 | 0.824362 |
| RNF169  | 1.149164 | 0.704928 | 1.873351 | 0.577109 |
| HERC2   | 0.829037 | 0.514812 | 1.335055 | 0.440555 |
