# Supplementary material for: DNA Damage Response Genes in Osteosarcoma
Source: Hindawi journal article supplement (doi:10.1155/2021/9365953), 2021-11-02
Supplement: f1 [file 9365953.f1.zip › 9365953.f1/Table S2.pdf]

**Table S2 The risk score of DDR genes signature in the TARGET group**

| id        | futime | fustat | NHEJ1    | RMI2    | SWI5    | ERCC2   | CLK2    | POLG    |
|-----------|--------|--------|----------|---------|---------|---------|---------|---------|
| TARGET-4C | 74     | 1      | 11.7787  | 20.7548 | 40.0489 | 11.2931 | 47.7583 | 54.6541 |
| TARGET-4C | 180    | 1      | 10.3223  | 11.2786 | 34.8907 | 17.6108 | 12.859  | 47.675  |
| TARGET-4C | 271    | 1      | 9.85758  | 5.33142 | 34.65   | 21.0171 | 26.4744 | 41.3906 |
| TARGET-4C | 286    | 0      | 9.41836  | 5.74032 | 31.4205 | 12.7265 | 14.9205 | 15.5077 |
| TARGET-4C | 290    | 1      | 10.1374  | 7.99346 | 50.8698 | 14.9305 | 25.993  | 24.7499 |
| TARGET-4C | 295    | 1      | 13.5711  | 21.5957 | 47.0187 | 23.7519 | 60.1429 | 64.8911 |
| TARGET-4C | 347    | 1      | 11.2474  | 4.83486 | 12.8658 | 5.87781 | 22.3341 | 38.7442 |
| TARGET-4C | 361    | 1      | 10.3694  | 8.99282 | 19.9338 | 8.62842 | 19.3471 | 36.6787 |
| TARGET-4C | 369    | 0      | 2.9882   | 11.0794 | 15.1426 | 16.569  | 39.8784 | 19.4017 |
| TARGET-4C | 377    | 0      | 6.36989  | 10.5517 | 26.2502 | 9.47845 | 26.6298 | 34.0631 |
| TARGET-4C | 378    | 1      | 17.2879  | 4.69125 | 24.1876 | 13.5854 | 54.419  | 50.0967 |
| TARGET-4C | 386    | 1      | 19.8975  | 8.6507  | 13.8705 | 13.1945 | 47.067  | 69.4078 |
| TARGET-4C | 388    | 1      | 11.697   | 7.89873 | 20.117  | 9.13342 | 50.5554 | 22.5885 |
| TARGET-4C | 422    | 1      | 35.9905  | 20.3262 | 24.7469 | 8.26696 | 16.2562 | 14.317  |
| TARGET-4C | 476    | 0      | 4.15381  | 3.71129 | 23.6355 | 14.8915 | 24.4317 | 14.9184 |
| TARGET-4C | 503    | 1      | 3.62576  | 3.81372 | 26.7934 | 8.13775 | 21.8934 | 26.1287 |
| TARGET-4C | 510    | 1      | 12.0193  | 5.63555 | 37.3996 | 10.7908 | 50.8662 | 41.6502 |
| TARGET-4C | 511    | 0      | 5.50451  | 8.30885 | 47.5969 | 14.2045 | 33.1255 | 19.7727 |
| TARGET-4C | 519    | 1      | 16.3514  | 4.05529 | 34.2025 | 8.86032 | 33.3583 | 40.3057 |
| TARGET-4C | 537    | 1      | 10.0934  | 3.43483 | 24.609  | 10.4304 | 31.082  | 43.6338 |
| TARGET-4C | 542    | 0      | 2.32894  | 5.34149 | 14.4124 | 3.41931 | 17.1698 | 20.3002 |
| TARGET-4C | 551    | 0      | 7.74376  | 8.48607 | 34.7024 | 13.8251 | 37.1873 | 47.1509 |
| TARGET-4C | 579    | 0      | 4.78273  | 30.5838 | 6.45926 | 4.01446 | 18.2884 | 26.8893 |
| TARGET-4C | 606    | 1      | 4.25616  | 7.5185  | 32.2236 | 5.71468 | 17.8247 | 268.701 |
| TARGET-4C | 619    | 0      | 16.5284  | 11.2164 | 45.1624 | 10.7756 | 34.0324 | 63.799  |
| TARGET-4C | 619    | 1      | 11.8732  | 10.8633 | 18.0221 | 16.2331 | 33.7419 | 72.6272 |
| TARGET-4C | 627    | 1      | 9.69422  | 12.0689 | 90.8826 | 15.4385 | 40.4476 | 84.2034 |
| TARGET-4C | 653    | 1      | 23.2306  | 3.58031 | 21.7993 | 17.2741 | 9.85726 | 38.6095 |
| TARGET-4C | 672    | 0      | 9.06292  | 6.89838 | 56.098  | 16.6916 | 66.2215 | 93.0325 |
| TARGET-4C | 679    | 1      | 17.7184  | 8.99638 | 20.8189 | 16.2457 | 51.536  | 56.4454 |
| TARGET-4C | 683    | 0      | 2.11132  | 3.36981 | 14.4738 | 16.4131 | 23.4091 | 27.7266 |
| TARGET-4C | 687    | 0      | 7.07448  | 10.092  | 40.6959 | 15.3218 | 51.2717 | 46.7289 |
| TARGET-4C | 708    | 0      | 7.81596  | 7.51254 | 29.7799 | 13.9395 | 25.2471 | 33.3394 |
| TARGET-4C | 754    | 1      | 9.82805  | 7.17404 | 29.7194 | 12.8038 | 16.6418 | 26.4179 |
| TARGET-4C | 756    | 1      | 8.67824  | 22.2311 | 33.3726 | 33.7559 | 135.888 | 74.4481 |
| TARGET-4C | 758    | 1      | 11.4975  | 8.65116 | 61.0729 | 9.78802 | 37.4397 | 35.4569 |
| TARGET-4C | 776    | 1      | 5.01211  | 15.2922 | 39.1372 | 9.99879 | 27.7549 | 34.1399 |
| TARGET-4C | 788    | 1      | 7.81038  | 5.95796 | 28.3475 | 13.2478 | 45.2626 | 82.2501 |
| TARGET-4C | 857    | 1      | 11.5437  | 8.73363 | 42.6663 | 23.196  | 128.207 | 24.5051 |
| TARGET-4C | 909    | 1      | 5.11733  | 10.5043 | 33.884  | 14.0981 | 46.7816 | 57.2732 |
| TARGET-4C | 922    | 0      | 9.02508  | 8.04616 | 64.3335 | 8.59056 | 20.156  | 38.3445 |
| TARGET-4C | 922    | 1      | 13.0623  | 11.4934 | 46.0285 | 15.0073 | 23.7664 | 43.3908 |
| TARGET-4C | 983    | 0      | 5.96987  | 9.14087 | 26.1876 | 18.7387 | 35.4772 | 18.8084 |
| TARGET-4C | 1003   | 1      | 0.878194 | 2.52087 | 9.40825 | 2.92729 | 2.2181  | 6.38974 |
| TARGET-4C | 1023   | 1      | 9.23522  | 19.3068 | 25.5347 | 10.6051 | 37.1273 | 61.1257 |
| TARGET-4C | 1029   | 0      | 63.8961  | 11.0762 | 38.49   | 10.1392 | 24.4195 | 27.2402 |
| TARGET-4C | 1061   | 1      | 9.57423  | 3.39269 | 34.8247 | 15.627  | 19.396  | 46.3519 |
| TARGET-4C | 1217   | 0      | 4.90731  | 10.4062 | 27.1237 | 11.1684 | 30.3161 | 55.7527 |
| TARGET-4C | 1323   | 0      | 6.08661  | 12.1811 | 82.6426 | 39.2792 | 19.3704 | 26.0549 |

|           |      |   |         |         |         |         |         |         |
|-----------|------|---|---------|---------|---------|---------|---------|---------|
| TARGET-4C | 1451 | 0 | 9.99624 | 9.15711 | 29.9993 | 15.2815 | 50.7175 | 42.8443 |
| TARGET-4C | 1468 | 0 | 7.0326  | 12.4235 | 41.3052 | 20.0666 | 40.5548 | 43.6307 |
| TARGET-4C | 1515 | 1 | 7.58461 | 11.931  | 49.3429 | 13.0215 | 55.7065 | 31.1165 |
| TARGET-4C | 1538 | 0 | 4.84422 | 12.5285 | 34.0813 | 13.3977 | 17.3114 | 18.2181 |
| TARGET-4C | 1575 | 0 | 5.84238 | 36.1181 | 66.1055 | 25.6961 | 38.97   | 46.9535 |
| TARGET-4C | 1579 | 1 | 14.1431 | 8.10775 | 41.533  | 15.0757 | 49.4595 | 90.8055 |
| TARGET-4C | 1580 | 0 | 6.46079 | 9.88871 | 60.6657 | 11.8784 | 21.4985 | 25.5997 |
| TARGET-4C | 1583 | 0 | 6.23001 | 5.71246 | 24.7412 | 25.2649 | 46.0669 | 50.5358 |
| TARGET-4C | 1616 | 0 | 8.52518 | 13.1613 | 39.0537 | 31.8087 | 32.1139 | 65.7963 |
| TARGET-4C | 1625 | 0 | 6.33526 | 11.0828 | 54.8834 | 10.6217 | 26.592  | 49.377  |
| TARGET-4C | 1631 | 1 | 6.36353 | 9.93599 | 26.8165 | 9.91395 | 38.564  | 33.0035 |
| TARGET-4C | 1637 | 1 | 16.6296 | 10.6061 | 21.8353 | 19.9286 | 83.0076 | 56.1497 |
| TARGET-4C | 1702 | 0 | 4.94311 | 15.9413 | 39.2231 | 19.0718 | 26.8778 | 54.104  |
| TARGET-4C | 1707 | 0 | 5.99293 | 6.78208 | 33.5194 | 10.486  | 26.608  | 38.1349 |
| TARGET-4C | 1719 | 0 | 3.67356 | 6.21483 | 24.8345 | 7.90471 | 23.9188 | 69.4359 |
| TARGET-4C | 1747 | 0 | 8.23919 | 12.5428 | 43.1974 | 13.7778 | 40.3292 | 33.2361 |
| TARGET-4C | 1750 | 0 | 14.4921 | 27.1171 | 26.2292 | 47.8867 | 44.8231 | 49.4369 |
| TARGET-4C | 1844 | 0 | 9.76558 | 10.5675 | 44.7096 | 29.4606 | 37.4164 | 40.3242 |
| TARGET-4C | 1865 | 0 | 11.2895 | 14.7814 | 31.5024 | 19.2343 | 24.5646 | 36.6544 |
| TARGET-4C | 1870 | 0 | 5.91108 | 23.0068 | 21.909  | 12.2535 | 18.6723 | 26.8773 |
| TARGET-4C | 1906 | 1 | 5.17172 | 7.6298  | 36.554  | 6.68794 | 21.0103 | 24.3934 |
| TARGET-4C | 1913 | 0 | 11.709  | 31.2328 | 62.7162 | 9.73327 | 28.7429 | 49.6808 |
| TARGET-4C | 2049 | 0 | 6.11009 | 11.9404 | 18.7473 | 12.9427 | 11.8536 | 39.4136 |
| TARGET-4C | 2062 | 0 | 4.96236 | 6.46164 | 44.3312 | 11.227  | 21.788  | 18.0643 |
| TARGET-4C | 2112 | 0 | 12.3583 | 14.2544 | 24.647  | 14.2661 | 28.0565 | 43.1917 |
| TARGET-4C | 2122 | 0 | 6.11591 | 10.5441 | 36.1949 | 19.6883 | 30.6525 | 25.4217 |
| TARGET-4C | 2163 | 0 | 5.33838 | 9.68988 | 57.6543 | 22.614  | 41.0337 | 53.5069 |
| TARGET-4C | 2216 | 0 | 5.42534 | 1.80053 | 24.1218 | 12.6218 | 20.8736 | 24.0202 |
| TARGET-4C | 2256 | 0 | 5.27    | 5.48167 | 50.1722 | 27.2712 | 19.2645 | 41.6908 |
| TARGET-4C | 2257 | 0 | 10.4244 | 9.90498 | 28.4957 | 18.6022 | 18.6769 | 24.1944 |
| TARGET-4C | 2462 | 0 | 20.935  | 10.7988 | 50.1564 | 15.7183 | 24.7187 | 21.4309 |
| TARGET-4C | 2520 | 0 | 8.987   | 19.3309 | 63.8273 | 18.9072 | 19.9773 | 30.9678 |
| TARGET-4C | 2526 | 0 | 7.38661 | 4.56634 | 12.9067 | 23.407  | 14.4381 | 18.8499 |
| TARGET-4C | 2610 | 0 | 9.32073 | 11.4757 | 44.1849 | 12.2742 | 13.3943 | 27.3904 |
| TARGET-4C | 2882 | 1 | 11.2276 | 9.96505 | 44.3074 | 29.1752 | 42.3224 | 84.4264 |
| TARGET-4C | 2948 | 0 | 15.7209 | 18.4585 | 37.7914 | 11.5545 | 23.6843 | 37.7931 |
| TARGET-4C | 3002 | 0 | 17.2487 | 17.0566 | 98.0952 | 16.6635 | 15.782  | 39.5369 |
| TARGET-4C | 3095 | 0 | 5.84314 | 14.2117 | 65.698  | 23.9364 | 28.0989 | 48.0436 |
| TARGET-4C | 3282 | 0 | 9.01097 | 12.0676 | 50.2364 | 29.0899 | 36.6981 | 48.5977 |
| TARGET-4C | 3378 | 0 | 4.12999 | 17.37   | 37.8885 | 8.42924 | 14.9017 | 33.0487 |
| TARGET-4C | 3378 | 0 | 7.23678 | 19.5328 | 57.2111 | 17.5692 | 23.1222 | 37.7972 |
| TARGET-4C | 3862 | 1 | 6.25852 | 9.19884 | 70.117  | 17.2665 | 27.9889 | 49.2923 |
| TARGET-4C | 3900 | 0 | 4.73162 | 5.07748 | 57.0143 | 11.7533 | 8.99137 | 34.2159 |
| TARGET-4C | 3946 | 0 | 9.83998 | 12.9618 | 25.2952 | 29.8772 | 24.1956 | 27.7675 |
| TARGET-4C | 4374 | 0 | 4.23831 | 23.2809 | 100.235 | 5.52033 | 24.076  | 37.6015 |
| TARGET-4C | 5840 | 0 | 9.22632 | 21.7458 | 28.7044 | 23.9243 | 29.6905 | 20.8026 |

| MLH1    | riskScorer | risk |
|---------|------------|------|
| 12.9576 | 1.911473   | high |
| 6.17662 | 1.042941   | low  |
| 17.7761 | 0.652087   | low  |
| 10.7506 | 1.444835   | high |
| 18.3465 | 0.597331   | low  |
| 10.3745 | 0.977009   | low  |
| 7.29188 | 9.303363   | high |
| 18.7629 | 1.801039   | high |
| 6.34737 | 2.050531   | high |
| 17.5791 | 1.360552   | high |
| 12.2674 | 9.821306   | high |
| 23.4005 | 4.963758   | high |
| 6.52796 | 10.68588   | high |
| 13.1552 | 4.789874   | high |
| 24.2288 | 0.572595   | low  |
| 15.4409 | 1.84931    | high |
| 21.6248 | 2.857787   | high |
| 10.3496 | 1.069654   | low  |
| 7.59264 | 8.541319   | high |
| 7.43224 | 6.215197   | high |
| 8.61176 | 4.3856     | high |
| 19.4199 | 1.19924    | high |
| 3.72873 | 1.959328   | high |
| 4.87479 | 18.18393   | high |
| 20.3302 | 1.788365   | high |
| 17.1468 | 1.959776   | high |
| 18.7201 | 0.406787   | low  |
| 12.0362 | 2.841867   | high |
| 6.98993 | 5.319339   | high |
| 18.6282 | 3.976996   | high |
| 9.76108 | 1.626306   | high |
| 12.9778 | 1.89213    | high |
| 12.64   | 1.459145   | high |
| 12.4775 | 1.408537   | high |
| 24.108  | 1.329565   | high |
| 8.98389 | 2.402531   | high |
| 14.9271 | 0.843945   | low  |
| 20.5073 | 2.559646   | high |
| 17.5122 | 7.132857   | high |
| 22.4348 | 1.030192   | low  |
| 11.2642 | 1.168239   | high |
| 14.304  | 0.914739   | low  |
| 15.8763 | 0.78002    | low  |
| 4.02976 | 4.505626   | high |
| 17.461  | 1.459293   | high |
| 46.788  | 3.594552   | high |
| 11.6467 | 1.56738    | high |
| 11.0231 | 2.169435   | high |
| 19.7592 | 0.013047   | low  |

14.1432 2.680549 high  
22.2722 0.37851 low  
6.3422 2.950338 high  
9.83888 0.751254 low  
27.5432 0.019402 low  
20.16 2.565996 high  
18.968 0.387901 low  
16.6031 0.869321 low  
19.428 0.151234 low  
11.1765 1.100859 low  
16.5429 2.025098 high  
13.4268 8.431396 high  
25.6542 0.176383 low  
19.9015 1.121216 low  
20.0531 1.782323 high  
19.409 0.803822 low  
12.2351 0.058125 low  
16.861 0.246589 low  
28.3146 0.222551 low  
17.0339 0.415842 low  
12.2574 1.813323 high  
18.8486 0.261019 low  
17.5156 0.706168 low  
21.329 0.53524 low  
32.5147 0.39536 low  
9.57655 0.755583 low  
19.186 0.296884 low  
13.6615 1.742993 high  
9.04017 0.287173 low  
12.5252 0.761181 low  
12.2785 1.340293 high  
24.9683 0.079395 low  
13.509 0.612013 low  
22.087 0.372735 low  
10.1799 0.737007 low  
7.66136 1.830841 high  
24.0124 0.088409 low  
14.5841 0.15779 low  
22.9432 0.13288 low  
15.7641 0.541747 low  
17.9839 0.175604 low  
12.9203 0.425186 low  
9.88101 0.718147 low  
12.4359 0.269895 low  
6.79015 0.327967 low  
13.3234 0.265626 low
